# Supplementary material for: A Novel Polysaccharide from Sargassum weizhouense: Extraction Optimization, Structural Characterization, Antiviral and Antioxidant Effects
Source: MDPI journal article supplement (doi:10.3390/antiox12101832), 2023-10-06
Supplement: s1 [file s1]

### Supplemental reagents

Ethanol, trichloroacetic acid, anthracene, sulfuric acid,  $\alpha$ -naphthol, iodine, potassium iodide, indamine, glycine, and sodium chloride were all analytically pure grades. Papain, Dextran T70, Dextran T40, Dextran T10, 4% paraformaldehyde, and Dextran Blue 2000 were purchased from Solarbio Technology Co., Ltd. (Beijing, China). Minimum Eagle's medium was purchased from Sigma-Aldrich Company (Darmstadt, Germany). Fetal bovine serum (FBS) was purchased from Biological Industries (Kibbutz Beit Haemek, Israel). The Thermo Scientific™ GeneJET Viral DNA/RNA Purification kit was purchased from Thermo Fisher Scientific (Waltham, MA, USA). The EZNA® Gel Extraction Kit, PCR purification kit, and Plasmid extraction kit were purchased from OMEGA (Connecticut, USA). The pMD™18-T Vector Cloning Kit and RNAiso Plus were purchased from Takara Bio-medical Technology Co., Ltd. (Beijing, China).

**Table S1.** Monosaccharide composition.

| Name                       | CAS Number<br>(Sigma) | Molecular For-<br>mula                        | Content ( $\mu\text{g}/\text{mg}$ ) |
|----------------------------|-----------------------|-----------------------------------------------|-------------------------------------|
| Fucose (Fuc)               | 2438-80-4             | C <sub>6</sub> H <sub>12</sub> O <sub>5</sub> | 4.4807                              |
| Arabinose (Ara)            | 5328-37-0             | C <sub>5</sub> H <sub>10</sub> O <sub>5</sub> | 1.3101                              |
| Rhamnose (Rha)             | 10030-85-0            | C <sub>6</sub> H <sub>14</sub> O <sub>6</sub> | 2.1440                              |
| Galactose (Gal)            | 26566-61-0            | C <sub>6</sub> H <sub>12</sub> O <sub>6</sub> | 4.5202                              |
| Glucose (Glc)              | 50-99-7               | C <sub>6</sub> H <sub>12</sub> O <sub>6</sub> | 9.4481                              |
| Xylose (Xyl)               | 58-86-6               | C <sub>5</sub> H <sub>10</sub> O <sub>5</sub> | 3.9688                              |
| Mannose (Man)              | 3458-28-4             | C <sub>6</sub> H <sub>14</sub> O <sub>6</sub> | 3.5177                              |
| Galacturonic Acid (Gal-UA) | 14982-50-4            | C <sub>6</sub> H <sub>10</sub> O <sub>7</sub> | 7.3167                              |
| Guluronic Acid (Gul-UA)    | 15769-56-9            | C <sub>6</sub> H <sub>10</sub> O <sub>7</sub> | 59.4252                             |
| Glucuronic Acid (Glc-UA)   | 6556-12-3             | C <sub>6</sub> H <sub>10</sub> O <sub>7</sub> | 2.6896                              |
| Mannuronic Acid (Man-UA)   | 6814-36-4             | C <sub>6</sub> H <sub>10</sub> O <sub>7</sub> | 222.3577                            |

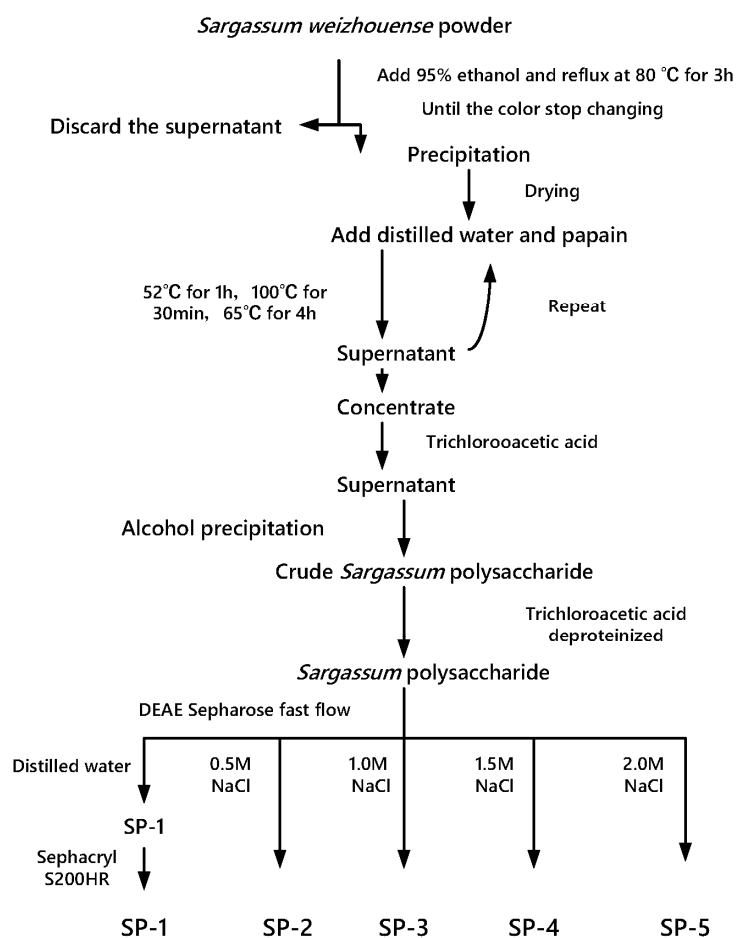

**Figure S1.** The process of extraction, isolation, and purification of *Sargassum weizhouense*.

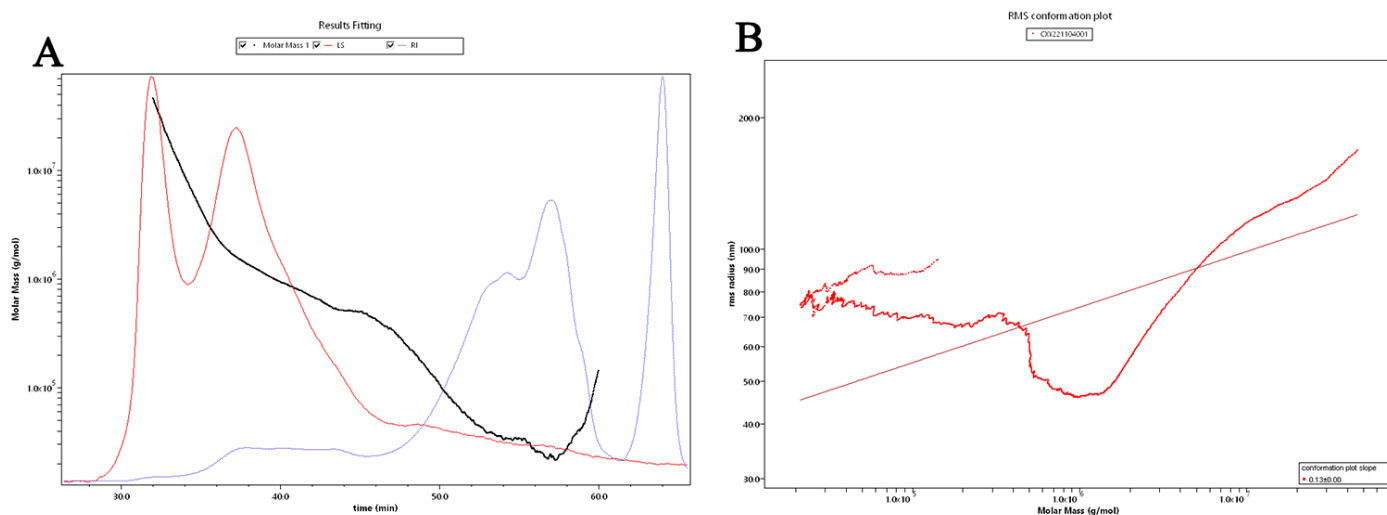

**Figure S2.** (A) Plot of absolute molecular weight analysis. Red line: the multi-angle laser light scattering signal (LS, unit: V). Blue line: the differential signal (RI, unit: RIU). Black line: the molecular weight fitted from the two signals. (B) The molecular configuration analysis of SP-1.

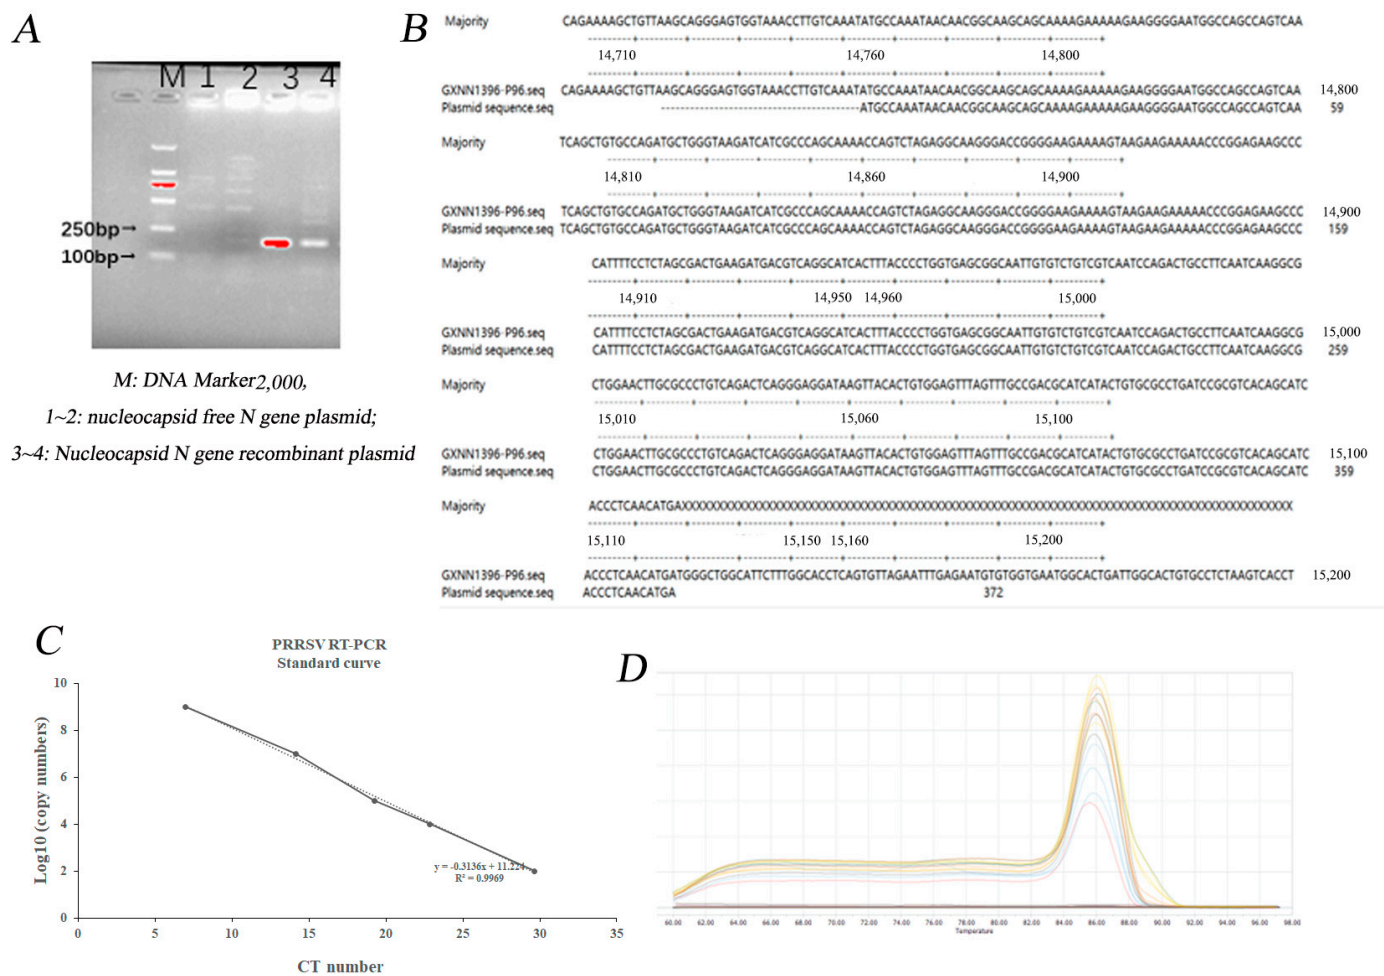

**Figure S3.** Construction of plasmid and establishment of qRT-PCR standard curve. (A) Gel electrophoresis detection of N gene recombinant plasmid. (B) Recombinant plasmid and PRRSV sequence alignment results. Note—the upper part is the sequence of plasmid N gene, whereas the lower part is PRRSV-GXNN1396. (C) Standard curve line of PRRSV qRT-PCR (CT-X). Note—The corresponding template concentrations from right to left in the above figure are:  $8.396 \times 10^9$ ,  $8.396 \times 10^7$ ,  $8.396 \times 10^5$ ,  $8.396 \times 10^4$ , and  $8.396 \times 10^2$  copies/ $\mu$ L. (D) Establishment of qRT-PCR melting curve.
